# Supplementary material for: Maternal genetic features of the Iron Age Tagar population from Southern Siberia (1st millennium BC)
Source: PLoS One. 2018 Sep 20;13(9):e0204062. doi: 10.1371/journal.pone.0204062 (PMC6147448; doi:10.1371/journal.pone.0204062)
Supplement: S5 Table — (XLSX) [file pone.0204062.s012.xlsx]

## Sheet: S5 Table
S5 Table. Results of the Haplotype Sharing Analysis (HSA) between the Tagar population (overall sample) and other ancient populations of Eurasia.
					Tagar	Yamnaya	Catacomb	Afanasievo	Okunevo	Andronovo_B	Andronovo_M	Tianshanbeilu	Bronze_MA	Pazyryk	Aldy_Bel	Scythians	Xiongnu
Population		HVRI haplotype*	Haplogroup	n	79	47	28	11	15	20	9	29	12	71	15	38	57
Tagar culture	1	(16183C)-16189C-16223T-16290T-16319A-16362C	A	1	1				1							1
This work	2	16075C-16223T-16242T-16290T-16319A	A8	1	1
	3	16223T-16242T-16278T-16290T-16319A	A8	1	1									1										Tagar	Yamnaya	Catacomb	Afanasievo	Okunevo	Andronovo_B	Andronovo_M	Tianshanbeilu	Bronze_MA	Pazyryk	Aldy_Bel	Scythians	Xiongnu
	4	16129A-16223T-16242T-16278T-16290T-16319A	A8	3	3																		N	79	47	28	11	15	20	9	29	12	71	15	38	57
	5	16193T-16223T-16242T-16278T-16290T-16319A	A8	1	1																	Tagar	79	79	12	8	0	4	5	5	3	3	21	1	11	11
	6	16223T-16242T-16278T-16290T-16311C-16319A	A8	2	2																	Yamnaya	47	17	47	19	4	6	1	4	1	3	10	2	9	1
	7	(16093C)-16129A-16223T-16298C-16327T	C	3	3					2				6			5					Catacomb	28	2	17	28	2	5	0	3	1	2	4	0	7	0
	8	16223T-16298C-16327T-16344T-16357C	C (C4a2a)	1	1																	Afanasievo	11	0	10	7	11	5	5	0	1	1	4	1	2	0
	9	16037G-16171G-16223T-16298C-16327T-16344T-16357C	C (C4a2a1)	1	1																	Okunevo	15	2	11	9	4	15	1	0	1	1	7	1	4	1
	10	16171G-16223T-16298C-16327T-16344T-16357C	C (C4a2a1)	1	1																	Andronovo_B	20	4	1	0	3	1	20	0	0	0	3	2	0	0
	11	(16093C)-16223T-16288C-16298C-16327T	C(C5)	1	1				3								1					Andronovo_M	9	14	8	8	0	0	0	9	0	2	8	1	5	0
	12	16223T-16362C	D	5	5							3	1	2		2	2					Tianshanbeilu	29	5	4	3	1	1	0	0	29	2	6	0	4	9
	13	16223T-16320T-16362C	D	2	2																	Bronze _MA	12	16	8	9	2	1	0	2	4	12	11	1	7	7
	14	16189C-16232A-16249C-16304C-16311C	F1b	1	1											1	1					Pazyryk	71	32	10	9	5	3	5	5	6	5	71	5	10	15
	15	16172C-16179T-(16183C)-16189C-16232A-16249C-16304C-16311C	F1b(F1b1b)	1	1																	Aldy_Bel	15	10	4	0	1	1	3	1	0	1	7	15	3	0
	16	(16093C)-16223T-16227G-16278T-16362C	G2a	3	3									1			1					Scythians	38	23	18	16	3	4	0	4	5	5	16	2	38	6
	17	16256T	H	1	1																	Xiongnu	57	16	1	0	0	3	0	0	6	3	16	0	4	57
	18	16304C	H	1	1											1
	19	16311C	H	2	2
	20	16172C-16311C	HV6	3	3									1
	21	16158T-16311C	HV*	1	1
	22	16129A-16223T-16304C-(16391A)	I	3	3																			Tagar	Yamnaya	Catacomb	Afanasievo	Okunevo	Andronovo_B	Andronovo_M	Tianshanbeilu	Bronze_MA	Pazyryk	Aldy_Bel	Scythians	Xiongnu
	23	16224C-16311C	K	1	1	1								1									N	79	47	28	11	15	20	9	29	12	71	15	38	57
	24	(16093C)-16224C-16311C-16319A	K(K1b1a)	2	2						1			3								Tagar	79	100	25.5319	28.5714	0	26.6667	25	55.5556	10.3448	25	29.5775	6.66667	28.9474	19.2982
	25	16224C-16311C-16320T	K(K1c2)	1	1									1								Yamnaya	47	21.519	100	67.8571	36.3636	40	5	44.4444	3.44828	25	14.0845	13.3333	23.6842	1.75439
	26	16126C-16163G-16186T-16189C-16294T	T1	10	10	3					1		1	3	1	2						Catacomb	28	2.53165	36.1702	100	18.1818	33.3333	0	33.3333	3.44828	16.6667	5.6338	0	18.4211	0
	27	16126C-16163G-16186T-16189C-16269G-16294T-16362C	T1	1	1																	Afanasievo	11	0	21.2766	25	100	33.3333	25	0	3.44828	8.33333	5.6338	6.66667	5.26316	0
	28	16126C-16189C-16292T-16294T-16296T	T (T2f7)	3	3																	Okunevo	15	2.53165	23.4043	32.1429	36.3636	100	5	0	3.44828	8.33333	9.85915	6.66667	10.5263	1.75439
	29	16126C-16189C-16292T-16294T	T	2	2									1								Andronovo_B	20	5.06329	2.12766	0	27.2727	6.66667	100	0	0	0	4.22535	13.3333	0	0
	30	16051G-16129C-(16183C)-(16193insC)-16362C	U2e	3	3	1											1					Andronovo_M	9	17.7215	17.0213	28.5714	0	0	0	100	0	16.6667	11.2676	6.66667	13.1579	0
	31	16051G-16092C-16129C-16189C-16260T-16362C	U2e	1	1																	Tianshanbeilu	29	6.32911	8.51064	10.7143	9.09091	6.66667	0	0	100	16.6667	8.4507	0	10.5263	15.7895
	32	16051G-16129C-16189C-16246G-16362C-(16391A)	U2e	2	2																	Bronze _MA	12	20.2532	17.0213	32.1429	18.1818	6.66667	0	22.2222	13.7931	100	15.493	6.66667	18.4211	12.2807
	33	16356C	U4	1	1	1	7				2		1	1		1						Pazyryk	71	40.5063	21.2766	32.1429	45.4545	20	25	55.5556	20.6897	41.6667	100	33.3333	26.3158	26.3158
	34	16134T-16356C	U4	1	1	2																Aldy_Bel	15	12.6582	8.51064	0	9.09091	6.66667	15	11.1111	0	8.33333	9.85915	100	7.89474	0
	35	16356C-16362C	U4(U4a3)	6	6																	Scythians	38	29.1139	38.2979	57.1429	27.2727	26.6667	0	44.4444	17.2414	41.6667	22.5352	13.3333	100	10.5263
	36	16192T-16256T-16270T-(16399G)	U5a	1	1	4	1				1					2						Xiongnu	57	20.2532	2.12766	0	0	20	0	0	20.6897	25	22.5352	0	10.5263	100
	37	16192T-16239T-16256T-16270T-(16399G)	U5a (U5a1h)	1	1					3
	38	16256T-16270T-16309G	U5a	1	1
	39	rCRS	U	3	3											1
				79	79	12	8	0	4	5	5	3	3	21	1	11	11
					Tagar	Yamnaya	Catacomb	Afanasievo	Okunevo	Andronovo_B	Andronovo_M	Tianshanbeilu	Bronze_MA	Pazyryk	Aldy_Bel	Scythians	Xiongnu
Population		HVRI haplotype*	Haplogroup	n	79	47	28	11	15	20	9	29	12	71	15	38	57
Yamnaya culture		16218T-16223T-16288C-16298C-16305T-16327T-16357C	C	1		1
Wilde et al., 2014		16218T-16223T-16298C-16327T-16357C	C	1		1
Allentoft et al., 2015	1	16188T	H	1		1
Haak et al., 2015	2	rCRS	H	4		4	2		1				1	3		1
Nikitin et al., 2017	3	16042A-16209C	H	1		1
		16261T	H	1		1
	4	16362C	H	2		2	4	1	3
	5	16129A-16172C-16223T-16311C-(16391A)	I	1		1
	6	16048A-16069T-16126C-16193T	J	1		1
		16224C-16311C	K	1	1	1								1
	7	16224C-16290T-16311C	K	1		1
	8	16192T-16224C-16311C	K	1		1
	9	16147G-16172C-16223T-16248T-16344T	N1a	1		1
	10	16126C-16163G-16186T-16189C-16294T	T1	3	10	3					1		1	3	1	2
	11	16126C-16292T-16294T	T	3		3		1
		16126C-16294T-16296T	T	2		2
	12	16126C-16294T-16296T-16324C	T	1		1			1
	13	16126C-16163G-16294T	T	1		1
	14	16051G-16129C-16362C	U2e	1	3	1											1
		16356C	U4	1	1	1	7				2		1	1		1
	15	16134T-16356C	U4	2	1	2
		16192T-16256T-16270T-16304C-(16399G)	U5a1	1		1		1		1				2	1
	16	16192T-16256T-16270T-(16399G)	U5a1	4	1	4	1				1					2
	17	16256T-16270T-(16399G)	U5a1	4		4	3	1	1			1				1
		16270T	U5	1		1	2									1
	18	16192T-16311C	U	1		1
		16311C	U	1		1
		16223T-16292T	W	1		1										1
	19	16192T-16223T-16292T-16325C	W	2		2
	20	16136C-16189C-16223T-16278T	X	1		1
				47	17	47	19	4	6	1	4	1	3	10	2	9	1
					Tagar	Yamnaya	Catacomb	Afanasievo	Okunevo	Andronovo_B	Andronovo_M	Tianshanbeilu	Bronze_MA	Pazyryk	Aldy_Bel	Scythians	Xiongnu
Population		HVRI haplotype*	Haplogroup	n	79	47	28	11	15	20	9	29	12	71	15	38	57
Catacomb culture	1	rCRS	H	2		4	2		1				1	3		1
Wilde et al., 2014	2	16354T	H	1			1									1
Nikitin et al., 2017	3	16362C	H	4		2	4	1	3
	4	16234T	H	1			1
	5	16223T-(16391A)	I	1			1
	6	16069T-16126C-16193T	J	1		1	1
	7	16069T-16126C-16145A-16172C-16222T-16261T	J	2			2
	8	16311C	R1	2			2
	9	16356C	U4	7	1	1	7				2		1	1		1
		16270T	U5	2		1	2									1
	10	16256T-16270T-(16399G)	U5a1	3		4	3	1	1			1				1
		16192T-16256T-16270T-16294T-16296T	U5a1	1			1
	11	16192T-16256T-16270T-(16399G)	U5a1	1	1	4	1				1					2
				28	2	17	28	2	5	0	3	1	2	4	0	7	0
					Tagar	Yamnaya	Catacomb	Afanasievo	Okunevo	Andronovo_B	Andronovo_M	Tianshanbeilu	Bronze_MA	Pazyryk	Aldy_Bel	Scythians	Xiongnu
Population		HVRI haplotype*	Haplogroup	n	79	47	28	11	15	20	9	29	12	71	15	38	57
Afanasievo culture	1	16223T-16298C-16327T	C	2				2		4				1
Allentoft et al., 2015	2	16362C	H	1		2	4	1	3
Hollard et al., 2018	3	16069T-16126C	J	2				2	1					1		1
	4	16037G-16311C-16319A	R	2				2					1
	5	16126C-16292T-16294T	T	1		3		1
	6	16354T-16356C	U4	1				1
	7	16256T-16270T-(16399G)	U5a1	1		4	3	1	1			1				1
	8	16192T-16256T-16270T-16304C	U5a1	1		1		1		1				2	1
				11	0	10	7	11	5	5	0	1	1	4	1	2	0
					Tagar	Yamnaya	Catacomb	Afanasievo	Okunevo	Andronovo_B	Andronovo_M	Tianshanbeilu	Bronze_MA	Pazyryk	Aldy_Bel	Scythians	Xiongnu
Population		HVRI haplotype*	Haplogroup	n	79	47	28	11	15	20	9	29	12	71	15	38	57
Okunevo culture	1	16189C-16223T-16290T-16319A-16362C	A	1	1				1							1
Alentoft et al., 2015	2	16242T-16290T-16293C-16319A	A11	1					1					3
Hollrd et al., 2018	3	16223T-16242T-16290T-16319A	A8	1					1						1
	4	16223T-16227C-16278T-16290T-16311C-16319A	A10	1					1	1
	5	(16093C)-16223T-16288C-16298C-16327T	C5	3	1				3								1
	6	16189C-16223T-16362C	D	1					1
	7	rCRS	H	1		4	2		1				1	3		1
	8	16362C	H	3		2	4	1	3
	9	16069T-16126C	J	1				2	1					1		1
	10	16126C-16294T-16296T-16324C	T	1		1			1
	11	15256T-16270T	U5a	1		4	3	1	1			1				1
				15	2	11	9	4	15	1	0	1	1	7	1	4	1
					Tagar	Yamnaya	Catacomb	Afanasievo	Okunevo	Andronovo_B	Andronovo_M	Tianshanbeilu	Bronze_MA	Pazyryk	Aldy_Bel	Scythians	Xiongnu
Population		HVRI haplotype*	Haplogroup	n	79	47	28	11	15	20	9	29	12	71	15	38	57
Andronovo time (Baraba forest-steppe)	1	16223T-16227C-16278T-16290T-16311C-16319A	A10	1					1	1
Molodin et al., 2012	2	16189C-16223T-16290T-16319A	A	1						1
	3	16188T-16189C-16223T-16290T-16319A-16356C-16362C	A	1						1
	4	16223T-16298C-16327T	C	4				2		4				1
	5	16129C-16223T-16298C-16327T	C	2	3					2
	6	16223T-16298C-16325C-16327T	C	1						1
	7	16223T-16298C-16325C-16327T-16362C	C	1						1
	8	16148T-16223T-16288C-16298C-16327T	C5	2						2					1
	9	16126C-16294T	T	2						2
	10	16086C-16126C-16140C-16294T-16296T	T	1						1
	11	16192T-16256T-16270T-16304C-(16399G)	U5a1	1		1		1		1				2	1
	12	16192T-16239T-16256T-16270T-(16399G)	U5a1	3	1					3
				20	4	1	0	3	1	20	0	0	0	3	2	0	0
					Tagar	Yamnaya	Catacomb	Afanasievo	Okunevo	Andronovo_B	Andronovo_M	Tianshanbeilu	Bronze_MA	Pazyryk	Aldy_Bel	Scythians	Xiongnu
Population		HVRI haplotype*	Haplogroup	n	79	47	28	11	15	20	9	29	12	71	15	38	57
Andronovo culture (Minusinsk basin)	1	16187T-16362C	H6	1							1
Keyser et al., 2009	2	(16093C)-16224C-16311C-16319A	K	1	2						1			3
	3	16126C-16163G-16186T-16189C-16294T	T1	1	10	3					1		1	3	1	2
	4	16126C-16294T-16324C	T	1							1
	5	16051G-16092C-16129C-(16183C)-16189C-16362C	U2e	1							1			1
	6	16356C	U4	2	1	1	7				2		1	1		1
	7	16192T-16256T-16270T	U5a1	1	1	4	1				1					2
	8	16129A-16185T-16223T-16224C-16260T-16298C	Z	1							1
				9	14	8	8	0	0	0	9	0	2	8	1	5	0
					Tagar	Yamnaya	Catacomb	Afanasievo	Okunevo	Andronovo_B	Andronovo_M	Tianshanbeilu	Bronze_MA	Pazyryk	Aldy_Bel	Scythians	Xiongnu
Population		HVRI haplotype	Haplogroup	n	79	47	28	11	15	20	9	29	12	71	15	38	57
Tianshanbeilu (Xinjiang)	1	16223T-16290T-16319A-16362C	A	1								1	1	2		1	3
Gao et al., 2015	2	16223T-16290T-16293C-16319A-16329A	A	1								1
	3	16148T-16223T-16239T-16290T-16319A-16362C-16376T	A	1								1
	4	16126C-16223T-16298C-16314G-16327T	C	1								1
	5	16129A-16150T-16223T-16298C-16327T	C	1								1
	6	16189C-16223T-16242T-16311C	D	1								1
	7	16223T-16362C	D	3	5							3	1	2		2	2
	8	16129A-16223T-16362C	D	1								1
	9	16127G-16223T-16362C	D	1								1
	10	16129A-16193T-16223T-16311C-16357C	D	1								1
	11	16223T-16245T-16362C	D	1								1					2
	12	16223T-16265G-16362C-16378T	D	1								1
	13	16223T-16256T-16319A	D	1								1
	14	16189C-16223T-16311C-16362C	D	1								1
	15	16223T-16227G-16278T-16362C	G	1								1		1			1
	16	16223T-16278T-16362C	G	1								1					1
	17	16093C-16169T-16183C-16189C-16304C	F	1								1
	18	16223T-16295T	M7	1								1
	19	16129A-16223T-16311C	M10	1								1
	20	16256T-16270T	U5	1		4	3	1	1			1				1
	21	16239T-16256T-16270T-16321T-16377T	U5	1								1
	22	16051G-16129C-16168T-(16183C)-16189C-16362C	U2e	1								1
	23	16079T-16262T-16321T-16356C	U (U4)	1								1
	24	16223T-16292T-16311C	W	1								1
	25	16185T-16223T-16260T	Z	1								1
	26	16185T-16223T-16260T-16298C-(16380T)	Z	1								1		1
	27	16185T-16223T-16260T-16362C	Z	1								1
				29	5	4	3	1	1	0	0	29	2	6	0	4	9
					Tagar	Yamnaya	Catacomb	Afanasievo	Okunevo	Andronovo_B	Andronovo_M	Tianshanbeilu	Bronze_MA	Pazyryk	Aldy_Bel	Scythians	Xiongnu
Population		HVRI haplotype	Haplogroup	n	79	47	28	11	15	20	9	29	12	71	15	38	57
Middle Bronze Age (Mongolian Altai)	1	16223T-16290T-16319A-16362C	A	1								1	1	2		1	3
Hollarg et al., 2014	2	16093C-16129A-16223T-16260T-16263C-16298C-16327T	C	1									1
	3	16223T-16362C	D	1	5							3	1	2		2	2
	4	16223T-16311C-16362C	D	1									1				2
	5	16092C-16129A-16223T-16362C	D	1									1
	6	16086C-16092C-16164G-(16182C)-(16183C)-16185T-16189C-(16193del)-16223T-16266T-16362C	D	1									1
	7	16037G-16311C-16319A	R1b1	1				2					1
	8	16305G-16311C	H	1									1
	9	16183C-16189C-16356C	H	1									1
	10	CRS	H	1		4	2		1				1	3		1
	11	(16093C)-16126C-16163G-16186T-16189C-16294T	T1	1	10	3					1		1	3	1	2
	12	16356C	U4	1	1	1	7				1		1	1		1
				12	16	8	9	2	1	0	2	4	12	11	1	7	7
					Tagar	Yamnaya	Catacomb	Afanasievo	Okunevo	Andronovo_B	Andronovo_M	Tianshanbeilu	Bronze_MA	Pazyryk	Aldy_Bel	Scythians	Xiongnu
Population		HVRI haplotype	Haplogroup	n	79	47	28	11	15	20	9	29	12	71	15	38	57
Pazyryk culture	1	16223T-16290T-16319A-16362C	A	2								1	1	2		1	3
Gonzalez-Ruiz et al., 2012 (n=16)	2	16242T-16290T-16293C-16319A	A	3					1					3			1
Voevoda et al., 2002 (n=2)	3	16223T-16242T-16278T-16290T-16319A	A8	1	1									1
Clisson et al., 2002 (n=2)	4	16093C-16223T-16242T-16278T-16290T-16311C-16319A	A8	1										1
Ricaut et al., 2004a (n=1)	5	16223T-16290T-16292A-16319A-16362C	A16	1										1			1
Ricaut et l., 2004b (n=2)	6	16223T-16298C-16327T	C	1				2		4				1
Unterlander et al., 2017 (n=46)	7	16086C-16223T-16287T-16298C-16327T	C	1										1
Pilipenko et al., 2010 (n=2)	8	(16093C)-16129A-16223T-16298C-16327T-16362C	C	1										1
	9	(16093C)-16129A-16223T-16298C-16327T	C	6	3									6			5
	10	16223T-16319A-16362C	D	1										1	1
	11	16223T-16239T-16319A-16362C	D	1										1
	12	16223T-16239T-16243C-16319A-16362C	D	2										2		1
	13	16042A-16223T-16243C-16362C	D	1										1
	14	16223T-16274A-16311C-16362C	D	1										1			2
	15	16223T-16278T-16362C	D	1										1
	16	16093C-16129A-16173T-16223T-16319A-16362C	D	1										1
	17	16093C-16172C-16173T-16223T-16319A-16362C	D	1										1
	18	16223T-16311C-16316G-16362C	D	1										1
	19	16223T-16362C	D	2	5							3	1	2		2	2
	20	16223T-16362C	G	1										1	2
	21	16223T-16263C-16325C-16362C	G1a	1										1
	22	16223T-16227G-16278T-16362C	G2a	1	3							1		1			1
	23	(16093C)-16203G-16231C-16291T-16304C	F2a	3										3
	24	rCRS	H	3		4	2		1				1	3		1
	25	16217C	HV2	2										2
	26	16172C-16311C	HV6	1	3									1
	27	16069T-16126C	J	1				2	1					1		1
	28	16126C-16163G-16186T-16189C-16294T	T1	3	10	3	7				1		1	3	1	2
	29	16126C-16294T-16304C	T	4										4
	30	16126C-16189C-16292T-16294T	T	1	2									1
	31	16051G-16129C-(16182C)-(16183C)-16189C-16362C	U2e	2										2		1
	32	16051G-(16092C)-16129C-(16183C)-16189C-16362C	U2e	1							1			1
	33	16051G-(16092C)-16129C-(16182C)-(16183C)-16189C-16362C	U2e	1										1
	34	16356C	U4	1	1	1					2		1	1		1
	35	16129A-16256T-16270T-16304C-(16399G)	U5a1	1						1				1
	36	16192T-16256T-16270T-16304C-(16399G)	U5a1	2		1		1						2	1
	37	16086C-16189C-16192T-16256T-16270T-16304C-(16399G)	U5a1	1										1
	38	(16093C)-16318T	U7	1										1
	39	(16093C)-16224C-16311C-16319A	K	3	2						1			3
	40	16224C-16311C-16320T	K	1	1									1
	41	16224C-16270T-16311C	K	1										1
	42	16224C-16311C	K	1	1	1								1
	43	16147A-16172C-16189C-16223T-16248T-16320T-16355T	N1a1a1a1a	1										1
	44	16188T-16189C-16223T-16286T	W	1										1
	45	16189C-16223T-16278T	X	1										1
	46	16185T-16223T-16260T-16298C	Z	1								1		1
	47	16129A-16185T-16223T-16224C-16260T-16294T-16298C	Z	1										1
				71	32	10	9	5	3	5	5	6	5	71	5	10	15
					Tagar	Yamnaya	Catacomb	Afanasievo	Okunevo	Andronovo_B	Andronovo_M	Tianshanbeilu	Bronze_MA	Pazyryk	Aldy_Bel	Scythians	Xiongnu
Population		HVRI haplotype	Haplogroup	n	79	47	28	11	15	20	9	29	12	71	15	38	57
Aldy Bel Culture (Tuva, Russia)	1	16223T-16242T-16290T-16319A	A8	1					1						1
Unterlander et al. 2017	2	16223T-16286T-16290T-16319A-16362C	A	1											1
	3	16224C-16242T-16290T-16293C-16319A	A (A11)	1											1
	4	16111A-16223T-16298C-16327T	C	1											1
	5	16148T-16223T-16288C-16298C-16327T	C5	1						2					1
	6	16223T-16319A-16362C	D4	1										1	1
	7	16223T-16362C	G	2										1	2
	8	16223T-16227G-16262T-16278T-16362C	G2a	1											1
	9	16189C	H	1											1
	10	16126C-16163G-16186T-16189C-16294T	T1	1	10	3					1		1	3	1	2
	11	16327A-16356C-16362C	U4	1											1
	12	16192T-16256T-16270T-16311C-(16399G)	U5a1	1						1					1	1
	13	16192T-16256T-16270T-16304T-(16399G)	U5a1	1				1						2	1
	14	16126C-116231C-16266T	Y	1		1									1
				15	10	4	0	1	1	3	1	0	1	7	15	3	0
					Tagar	Yamnaya	Catacomb	Afanasievo	Okunevo	Andronovo_B	Andronovo_M	Tianshanbeilu	Bronze_MA	Pazyryk	Aldy_Bel	Scythians	Xiongnu
Population		HVRI haplotype	Haplogroup	n	79	47	28	11	15	20	9	29	12	71	15	38	57
Classic Scythian (North Pontic Region)	1	16223T-16290T-16319A-16362C	A	1								1	1	2		1	3
Der Sarkissian, 2011		(16093C)-16189C-16223T-16290T-16319A-16362C	A	1	1				1							1
Unterlander et al., 2017	2	16223T-16258G-16298C-16327T	C	1												1
Juras et al., 2017	3	16223T-16362C	D	2	5							3	1	2		2	2
	4	16223T-16239T-16243C-16319A-16362C	D	1										2		1
	5	16189C-16232A-16249C-16304C-16311C	F1b	1	1											1	1
		16189C-16304C-16343G	F1d	1												1
	6	rCRS	H	1		4	2		1				1	3		1
		16184T	H	1												1
		16304C	H	1	1											1
	7	16354T	H	1			1									1
	8	16288C-16362C	H	2												2
		16224C-16278T-16304C	H	1												1
	9	16086C-16129A-16233T-(16391A)	I	2												2
		16069T-16126C	J	1				2	1					1		1
	10	16069T-16126C-16193T-16278T	J	2												2
		16093C-16129A-16223T--16311C-16357C	M10	1												1
		16145A-16176G-16223T-16390A	N1b1a	1												1
	11	16126C-16163G-16186T-16189C-16294T	T1	2	10	3					1		1	3	1	2
	12	16078G-16126C-16294T-16296T	T	1												1
		16093C-16126C-16272G-16294T-16296T-16304C	T	1												1
	13	16051G-16129C-16189C-16362C	U2e	1										2		1
	14	16356C	U4	1	1	1	7				2		1	1		1
	15	16192T-16256T-16263C-16270T-(16399G)	U5a	1												1
	16	16192T-16256T-16270T-16311C	U5a	1											1	1
		16114A-16192T-16270T-16294T	U5a	1												1
		16192T-16256T-16270T-(16399G)	U5a	2	1	4	1				1					2
		16256T-16270T-(16399G)	U5a	1		4	3	1	1			1				1
		16270T-(16399G)	U5a	1		1	2									1
		rCRS	U	1	3											1
		16223T-16292T	W	1		1										1
	17	(16183C)-16189C-16223T-16266T-16274A-16278T-(16390A)	X	1												1
				38	23	18	16	3	4	0	4	5	5	16	2	38	6
					Tagar	Yamnaya	Catacomb	Afanasievo	Okunevo	Andronovo_B	Andronovo_M	Tianshanbeilu	Bronze_MA	Pazyryk	Aldy_Bel	Scythians	Xiongnu
Population		HVRI haplotype	Haplogroup	n	79	47	28	11	15	20	9	29	12	71	15	38	57
Xiongnu (Mongolia and Transbaikalia)	1	16223T-16239T-16243C-16319A-16362C	A	1													1
Keyser-Tracqui et al., 2003, 2006	2	16179T-16192T-16223T-16290T-16319A-16362C	A	2													2
Pilipenko et al., 2017	3	16223T-16290T-16293C-16319A	A	1										3			1
	4	16223T-16290T-16319A-16362C	A	3								1	1	2		1	3
	5	(16183G)-16189C-16223T-16277G-16290T-16319A-16362C	A	1													1
	6	16223T-16287T-16290T-16319A-16355T-16362C	A	1													1
	7	16223T-16290T-16292A-16319A-16362C	A (A16)	1										1			1
	8	16086C-16136C-(16183C)-16189C-16217C	B4b	1													1
	9	(16093C)-16140C-(16183C)-16189C-16243C-16274A	B (B5b4)	1													1
	10	(16093C)-16129A-16223T-16298C-16327T	C	5	3									6			5
	11	16223T-16291T-16298C-16327T	C	1													1
	12	16223T-16239T-16298C-16300G-16327T-16357C	C	1													1
	13	(16093C)-16223T-16288C-16298C-16327T	C5	1	1				3								1
	14	(16093C)-16129A-16213A-16298C-16327T	C	1													1
	15	16148T-16164G-16223T-16288C-16298C-16327T	C (C5b1b)	1													1
	16	16223T-16362C	D4	2	5							3	1	2		2	2
	17	(16093C)-16223T-16245T-16362C	D4	2													2
	18	16223T-16232T-16290T-16362C	D4	3													3
	19	16223T-16274A-16362C	D4	2													2
	20	16223T-16274A-16311C-16362C	D4	2										1			2
	21	16223T-16311C-16362C	D4	2									1				2
	22	16223T-16362C-16368C	D4	1													1
	23	16187T-16223T-16362C	D (D4)	1													1
	24	16223T-16287T-16362C	D (D4)	1													1
	25	16223T-16294T-16362C	D (D4)	1													1
	26	16223T-16297C-16362C	D (D4)	2													2
	27	16092C-16189C-16223T-16311C-16362C	D5	2													2
	28	16223T-16227G-16278T-16362C	G2a	1	3							1		1			1
	29	16223T-16278T-16362C	G	1								1					1
	30	(16093C)-16183C-18189-16304	F	2													2
	31	(16183C)-16189C-16232A-16249C-16304C-16311C	F1b	1	1											1	1
	32	(16093C)-16187T-16223T-16257A-16261T	N9a	1													1
	33	16126C-16231C-16266T	Y (Y1)	1													1
	34	16066G-16223T-16319A	M*	1													1
	35	16129A-16223T	M*	1													1
	36	16069T-16092C-16126C-16261T	J1	2													2
	37	16129C-(16183C)-(16193.1C)-16362C	U2e	1	3	1											1
	38	16256T-16270T-16362C	U5a	2													2
				57	16	1	0	0	3	0	0	6	3	16	0	4	57
